# Supplementary material for: Genome-wide DNA methylation regulation analysis of long non-coding RNAs in glioblastoma
Source: PubMed Central journal article supplement — Int J Mol Med. 2020 Apr 15;46(1):224–38. doi: 10.3892/ijmm.2020.4579 (PMC7255472; doi:10.3892/ijmm.2020.4579), 2020-04-15
Supplement: Supplementary_Data.pdf [file Supplementary_Data.pdf]

Figure S1. Venn diagram showing the number of lncRNAs in both scenarios. The first scenario was hypermethylated-under-expressed lncRNAs and hypomethylated-highly expressed lncRNAs. The second scenario was lncRNAs with a significant negative correlation between methylation and corresponding expression. lncRNA, long non-coding RNA.

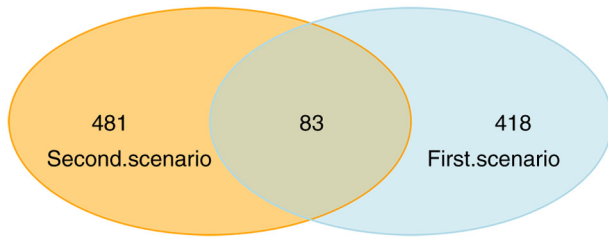

Figure S2. Boxplots with comparisons of methylation levels between glioblastoma and normal samples of all CpG probes annotated to the SNHG9 promoter and the SNHG16 promoter. The probe sequences closer to the right in the figure were closer to the transcriptional start site. \* $P \leq 0.05$ , \*\* $P \leq 0.001$ , \*\*\* $P \leq 0.0001$  vs. respective tumor tissue. SNHG, small nucleolar RNA host gene.

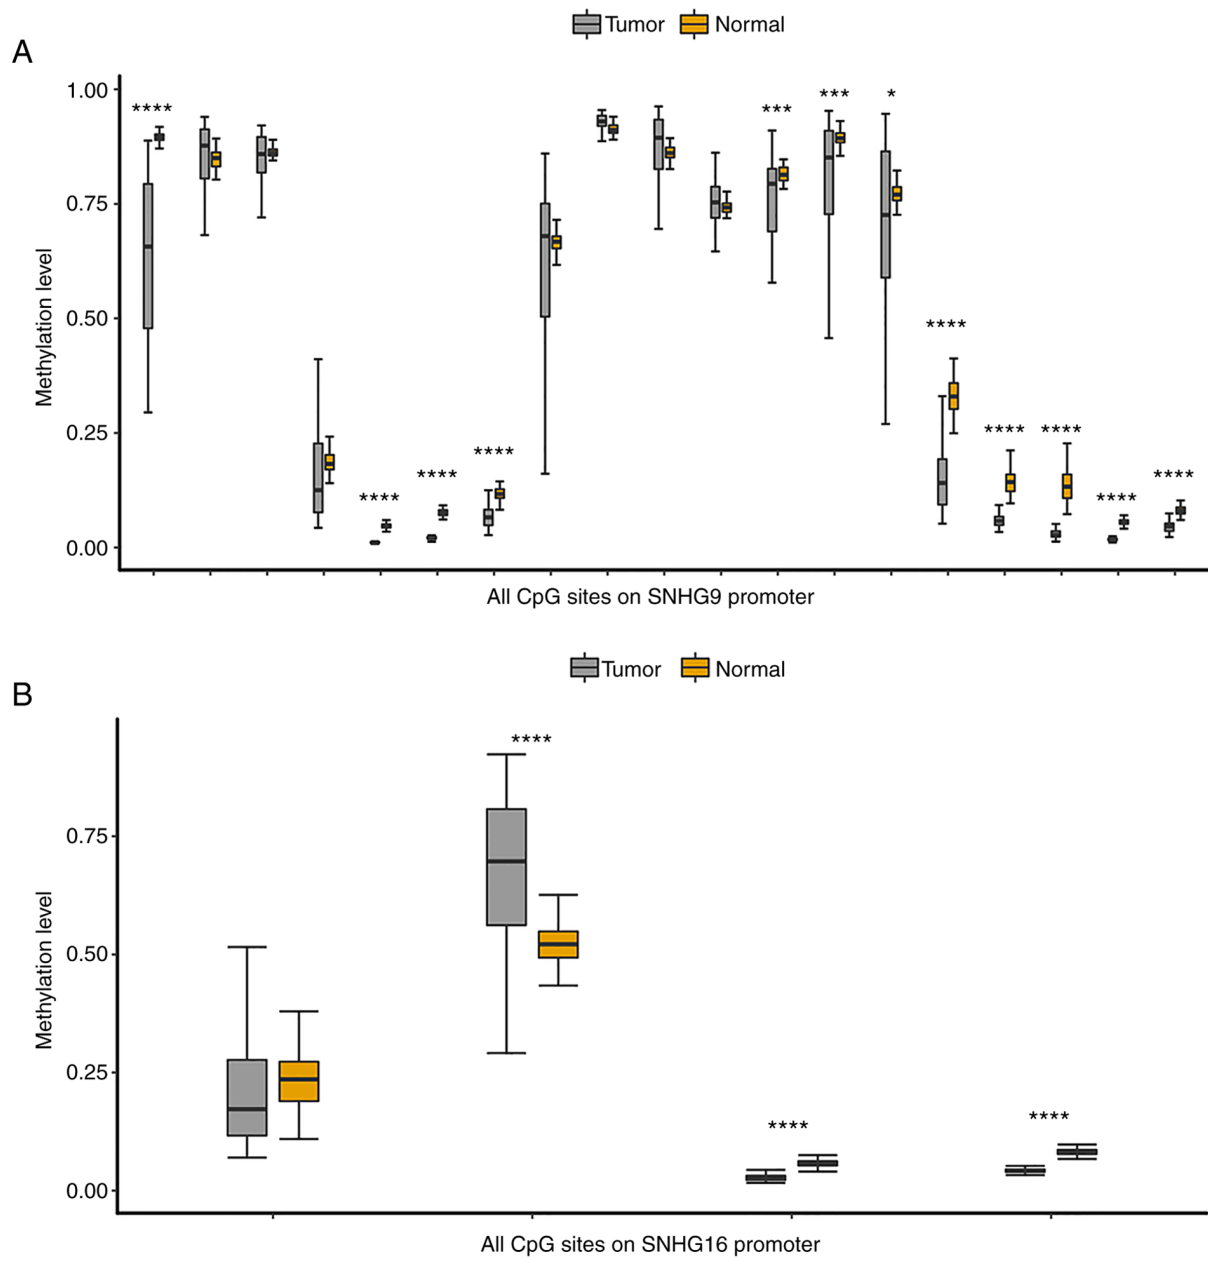

Table SI. Long non-coding RNAs whose expression level in glioblastoma was regulated by aberrant methylation of corresponding promoters.

| A, Hypermethylated promoter |               |              |                       |                |
|-----------------------------|---------------|--------------|-----------------------|----------------|
| ENSG                        | Expression    | PCC          | PCC.pval              | Scenario       |
| ENSG00000266002             | Downregulated | -0.462403217 | 0.000723              | Both           |
| ENSG00000236854             | Downregulated | -0.419079591 | 0.002452              | Both           |
| ENSG00000223396             | Downregulated | -0.339690952 | 0.015801              | Both           |
| ENSG00000207955             | Downregulated | -0.61294548  | 2.23x10 <sup>-6</sup> | Both           |
| ENSG0000012171              | Downregulated | -0.281547609 | 0.047618              | Both           |
| ENSG00000237941             | Downregulated | -0.368930813 | 0.008377              | Both           |
| ENSG00000269889             | Downregulated | -0.532726463 | 6.82x10 <sup>-5</sup> | Both           |
| ENSG00000268575             | Downregulated | -0.281372211 | 0.047763              | Both           |
| ENSG00000237737             | Downregulated | -0.323284236 | 0.02202               | Both           |
| ENSG00000204860             | Downregulated | -0.404532697 | 0.003571              | Both           |
| ENSG00000233208             | Downregulated | -0.301541827 | 0.033329              | Both           |
| ENSG00000262668             | Downregulated | -0.393021294 | 0.004752              | Both           |
| ENSG00000269364             | Downregulated | -0.464354356 | 0.000681              | Both           |
| ENSG00000250243             | Downregulated | -0.28256035  | 0.046791              | Both           |
| ENSG00000226330             | Downregulated | -0.411665206 | 0.002976              | Both           |
| ENSG00000260163             | Downregulated | -0.364081199 | 0.009344              | Both           |
| ENSG00000241135             | Downregulated | -0.301157077 | 0.033565              | Both           |
| ENSG00000260992             | Downregulated | -0.293287589 | 0.038725              | Both           |
| ENSG00000249926             | Downregulated | -0.375360452 | 0.00723               | Both           |
| ENSG00000234056             | Downregulated | -0.296875867 | 0.036297              | Both           |
| ENSG00000260439             | Downregulated | -0.576793697 | 1.16x10 <sup>-5</sup> | Both           |
| ENSG00000225140             | Downregulated | -0.288667433 | 0.042046              | Both           |
| ENSG00000262296             | Downregulated | -0.415278511 | 0.00271               | Both           |
| ENSG00000237438             | Downregulated | -0.531473879 | 7.14x10 <sup>-5</sup> | Both           |
| ENSG00000249509             | Downregulated | -0.415135866 | 0.00272               | Both           |
| ENSG00000255366             | Downregulated | -0.536873339 | 5.83x10 <sup>-5</sup> | Both           |
| ENSG00000258725             | Downregulated | -0.298519996 | 0.035227              | Both           |
| ENSG00000228624             | Downregulated | -0.330255626 | 0.019163              | Both           |
| ENSG00000267786             | Downregulated | -0.287336693 | 0.043045              | Both           |
| ENSG00000270557             | Downregulated | -0.336114729 | 0.017011              | Both           |
| ENSG00000235749             | Downregulated | -0.351706397 | 0.012258              | Both           |
| ENSG00000237361             | Downregulated | -0.546838591 | 3.98x10 <sup>-5</sup> | Both           |
| ENSG00000224215             | Downregulated | -0.534938279 | 6.28x10 <sup>-5</sup> | Both           |
| ENSG00000251670             | Downregulated | -0.337615074 | 0.016494              | Both           |
| ENSG00000250366             | Downregulated | -0.498834315 | 0.000227              | Both           |
| ENSG00000261696             | Downregulated | -0.463682664 | 0.000695              | Both           |
| ENSG00000273295             | Downregulated | -0.2881428   | 0.042437              | Both           |
| ENSG00000253653             | Downregulated | -0.282912172 | 0.046506              | Both           |
| ENSG00000228223             | Downregulated | -0.510814513 | 0.00015               | Both           |
| ENSG00000261018             | Downregulated | -0.308214366 | 0.029436              | Both           |
| ENSG00000250790             | Downregulated | -0.302998604 | 0.032444              | Both           |
| ENSG00000257556             | Downregulated | -0.392883012 | 0.004768              | Both           |
| ENSG00000253973             | Downregulated | -0.361421694 | 0.009914              | Both           |
| ENSG00000266844             | Downregulated | -0.412315003 | 0.002926              | Both           |
| ENSG00000256577             | Downregulated | -0.507819359 | 0.000167              | Both           |
| ENSG00000205488             | Downregulated | N/A          | N/A                   | First scenario |
| ENSG00000228016             | Downregulated | N/A          | N/A                   | First scenario |
| ENSG00000250685             | Downregulated | N/A          | N/A                   | First scenario |
| ENSG00000232002             | Downregulated | N/A          | N/A                   | First scenario |
| ENSG00000224614             | Downregulated | N/A          | N/A                   | First scenario |
| ENSG00000237798             | Downregulated | N/A          | N/A                   | First scenario |
| ENSG00000261207             | Downregulated | N/A          | N/A                   | First scenario |
| ENSG00000229960             | Downregulated | N/A          | N/A                   | First scenario |
| ENSG00000251621             | Downregulated | N/A          | N/A                   | First scenario |
| ENSG00000229203             | Downregulated | N/A          | N/A                   | First scenario |
| ENSG00000223754             | Downregulated | N/A          | N/A                   | First scenario |

Table SI. Continued.

| ENSG            | Expression    | PCC | PCC.pval | Scenario       |
|-----------------|---------------|-----|----------|----------------|
| ENSG00000230149 | Downregulated | N/A | N/A      | First scenario |
| ENSG00000237301 | Downregulated | N/A | N/A      | First scenario |
| ENSG00000250282 | Downregulated | N/A | N/A      | First scenario |
| ENSG00000236834 | Downregulated | N/A | N/A      | First scenario |
| ENSG00000254251 | Downregulated | N/A | N/A      | First scenario |
| ENSG00000256250 | Downregulated | N/A | N/A      | First scenario |
| ENSG00000265780 | Downregulated | N/A | N/A      | First scenario |
| ENSG00000260051 | Downregulated | N/A | N/A      | First scenario |
| ENSG00000272588 | Downregulated | N/A | N/A      | First scenario |
| ENSG00000223711 | Downregulated | N/A | N/A      | First scenario |
| ENSG00000271778 | Downregulated | N/A | N/A      | First scenario |
| ENSG00000230126 | Downregulated | N/A | N/A      | First scenario |
| ENSG00000237512 | Downregulated | N/A | N/A      | First scenario |
| ENSG00000270697 | Downregulated | N/A | N/A      | First scenario |
| ENSG00000232767 | Downregulated | N/A | N/A      | First scenario |
| ENSG00000181800 | Downregulated | N/A | N/A      | First scenario |
| ENSG00000256050 | Downregulated | N/A | N/A      | First scenario |
| ENSG00000257913 | Downregulated | N/A | N/A      | First scenario |
| ENSG00000261101 | Downregulated | N/A | N/A      | First scenario |
| ENSG00000267259 | Downregulated | N/A | N/A      | First scenario |
| ENSG00000237863 | Downregulated | N/A | N/A      | First scenario |
| ENSG00000231976 | Downregulated | N/A | N/A      | First scenario |
| ENSG00000233532 | Downregulated | N/A | N/A      | First scenario |
| ENSG00000272182 | Downregulated | N/A | N/A      | First scenario |
| ENSG00000260060 | Downregulated | N/A | N/A      | First scenario |
| ENSG00000235007 | Downregulated | N/A | N/A      | First scenario |
| ENSG00000224883 | Downregulated | N/A | N/A      | First scenario |
| ENSG00000251460 | Downregulated | N/A | N/A      | First scenario |
| ENSG00000227748 | Downregulated | N/A | N/A      | First scenario |
| ENSG00000268262 | Downregulated | N/A | N/A      | First scenario |
| ENSG00000230751 | Downregulated | N/A | N/A      | First scenario |
| ENSG00000273267 | Downregulated | N/A | N/A      | First scenario |
| ENSG00000226291 | Downregulated | N/A | N/A      | First scenario |
| ENSG00000272824 | Downregulated | N/A | N/A      | First scenario |
| ENSG00000258525 | Downregulated | N/A | N/A      | First scenario |
| ENSG00000229533 | Downregulated | N/A | N/A      | First scenario |
| ENSG00000272420 | Downregulated | N/A | N/A      | First scenario |
| ENSG00000258199 | Downregulated | N/A | N/A      | First scenario |
| ENSG00000251575 | Downregulated | N/A | N/A      | First scenario |
| ENSG00000273214 | Downregulated | N/A | N/A      | First scenario |
| ENSG00000256705 | Downregulated | N/A | N/A      | First scenario |
| ENSG00000269736 | Downregulated | N/A | N/A      | First scenario |
| ENSG00000234917 | Downregulated | N/A | N/A      | First scenario |
| ENSG00000256747 | Downregulated | N/A | N/A      | First scenario |
| ENSG00000253576 | Downregulated | N/A | N/A      | First scenario |
| ENSG00000273108 | Downregulated | N/A | N/A      | First scenario |
| ENSG00000233930 | Downregulated | N/A | N/A      | First scenario |
| ENSG00000273257 | Downregulated | N/A | N/A      | First scenario |
| ENSG00000235118 | Downregulated | N/A | N/A      | First scenario |
| ENSG00000250448 | Downregulated | N/A | N/A      | First scenario |
| ENSG00000273117 | Downregulated | N/A | N/A      | First scenario |
| ENSG00000272511 | Downregulated | N/A | N/A      | First scenario |
| ENSG00000255176 | Downregulated | N/A | N/A      | First scenario |
| ENSG00000253301 | Downregulated | N/A | N/A      | First scenario |
| ENSG00000254497 | Downregulated | N/A | N/A      | First scenario |
| ENSG00000234614 | Downregulated | N/A | N/A      | First scenario |
| ENSG00000265750 | Downregulated | N/A | N/A      | First scenario |
| ENSG00000249790 | Downregulated | N/A | N/A      | First scenario |
| ENSG00000259604 | Downregulated | N/A | N/A      | First scenario |

Table SI. Continued.

| ENSG            | Expression    | PCC | PCC.pval | Scenario       |
|-----------------|---------------|-----|----------|----------------|
| ENSG00000272989 | Downregulated | N/A | N/A      | First scenario |
| ENSG00000261379 | Downregulated | N/A | N/A      | First scenario |
| ENSG00000272583 | Downregulated | N/A | N/A      | First scenario |
| ENSG00000255778 | Downregulated | N/A | N/A      | First scenario |
| ENSG00000237476 | Downregulated | N/A | N/A      | First scenario |
| ENSG00000254236 | Downregulated | N/A | N/A      | First scenario |
| ENSG00000157152 | Downregulated | N/A | N/A      | First scenario |
| ENSG00000262155 | Downregulated | N/A | N/A      | First scenario |
| ENSG00000225234 | Downregulated | N/A | N/A      | First scenario |
| ENSG00000262445 | Downregulated | N/A | N/A      | First scenario |
| ENSG00000273156 | Downregulated | N/A | N/A      | First scenario |
| ENSG00000234921 | Downregulated | N/A | N/A      | First scenario |
| ENSG00000245748 | Downregulated | N/A | N/A      | First scenario |
| ENSG00000254566 | Downregulated | N/A | N/A      | First scenario |
| ENSG00000233110 | Downregulated | N/A | N/A      | First scenario |
| ENSG00000269982 | Downregulated | N/A | N/A      | First scenario |
| ENSG00000260750 | Downregulated | N/A | N/A      | First scenario |
| ENSG00000238120 | Downregulated | N/A | N/A      | First scenario |
| ENSG00000267874 | Downregulated | N/A | N/A      | First scenario |
| ENSG00000232684 | Downregulated | N/A | N/A      | First scenario |
| ENSG00000253100 | Downregulated | N/A | N/A      | First scenario |
| ENSG00000260279 | Downregulated | N/A | N/A      | First scenario |
| ENSG00000261253 | Downregulated | N/A | N/A      | First scenario |
| ENSG00000260837 | Downregulated | N/A | N/A      | First scenario |
| ENSG00000266885 | Downregulated | N/A | N/A      | First scenario |
| ENSG00000249330 | Downregulated | N/A | N/A      | First scenario |
| ENSG00000261650 | Downregulated | N/A | N/A      | First scenario |
| ENSG00000234929 | Downregulated | N/A | N/A      | First scenario |
| ENSG00000272774 | Downregulated | N/A | N/A      | First scenario |
| ENSG00000237647 | Downregulated | N/A | N/A      | First scenario |
| ENSG00000224177 | Downregulated | N/A | N/A      | First scenario |
| ENSG00000227619 | Downregulated | N/A | N/A      | First scenario |
| ENSG00000267034 | Downregulated | N/A | N/A      | First scenario |
| ENSG00000229122 | Downregulated | N/A | N/A      | First scenario |
| ENSG00000272148 | Downregulated | N/A | N/A      | First scenario |
| ENSG00000272506 | Downregulated | N/A | N/A      | First scenario |
| ENSG00000254664 | Downregulated | N/A | N/A      | First scenario |
| ENSG00000240707 | Downregulated | N/A | N/A      | First scenario |
| ENSG00000273113 | Downregulated | N/A | N/A      | First scenario |
| ENSG00000180458 | Downregulated | N/A | N/A      | First scenario |
| ENSG00000205041 | Downregulated | N/A | N/A      | First scenario |
| ENSG00000259709 | Downregulated | N/A | N/A      | First scenario |
| ENSG00000238121 | Downregulated | N/A | N/A      | First scenario |
| ENSG00000244124 | Downregulated | N/A | N/A      | First scenario |
| ENSG00000226709 | Downregulated | N/A | N/A      | First scenario |
| ENSG00000271806 | Downregulated | N/A | N/A      | First scenario |
| ENSG00000224478 | Downregulated | N/A | N/A      | First scenario |
| ENSG00000224265 | Downregulated | N/A | N/A      | First scenario |
| ENSG00000259933 | Downregulated | N/A | N/A      | First scenario |
| ENSG00000258424 | Downregulated | N/A | N/A      | First scenario |
| ENSG00000234942 | Downregulated | N/A | N/A      | First scenario |
| ENSG00000235281 | Downregulated | N/A | N/A      | First scenario |
| ENSG00000263120 | Downregulated | N/A | N/A      | First scenario |
| ENSG00000254921 | Downregulated | N/A | N/A      | First scenario |
| ENSG00000259540 | Downregulated | N/A | N/A      | First scenario |
| ENSG00000255087 | Downregulated | N/A | N/A      | First scenario |
| ENSG00000224795 | Downregulated | N/A | N/A      | First scenario |
| ENSG00000226762 | Downregulated | N/A | N/A      | First scenario |
| ENSG00000253106 | Downregulated | N/A | N/A      | First scenario |

Table SI. Continued.

| ENSG            | Expression    | PCC          | PCC.pval              | Scenario        |
|-----------------|---------------|--------------|-----------------------|-----------------|
| ENSG00000265313 | Downregulated | N/A          | N/A                   | First scenario  |
| ENSG00000253965 | Downregulated | N/A          | N/A                   | First scenario  |
| ENSG00000237714 | Downregulated | N/A          | N/A                   | First scenario  |
| ENSG00000257057 | Downregulated | N/A          | N/A                   | First scenario  |
| ENSG00000229703 | Downregulated | N/A          | N/A                   | First scenario  |
| ENSG00000272335 | Downregulated | N/A          | N/A                   | First scenario  |
| ENSG00000182376 | Downregulated | N/A          | N/A                   | First scenario  |
| ENSG00000240527 | Downregulated | N/A          | N/A                   | First scenario  |
| ENSG00000271192 | Downregulated | N/A          | N/A                   | First scenario  |
| ENSG00000272449 | Downregulated | N/A          | N/A                   | First scenario  |
| ENSG00000268458 | Downregulated | N/A          | N/A                   | First scenario  |
| ENSG00000272720 | Downregulated | N/A          | N/A                   | First scenario  |
| ENSG00000259031 | Downregulated | N/A          | N/A                   | First scenario  |
| ENSG00000248719 | Downregulated | N/A          | N/A                   | First scenario  |
| ENSG00000271366 | Downregulated | N/A          | N/A                   | First scenario  |
| ENSG00000229330 | Downregulated | N/A          | N/A                   | First scenario  |
| ENSG00000268049 | Downregulated | N/A          | N/A                   | First scenario  |
| ENSG00000261227 | Downregulated | N/A          | N/A                   | First scenario  |
| ENSG00000251226 | Downregulated | N/A          | N/A                   | First scenario  |
| ENSG00000256925 | Downregulated | N/A          | N/A                   | First scenario  |
| ENSG00000273375 | Downregulated | N/A          | N/A                   | First scenario  |
| ENSG00000263874 | Downregulated | N/A          | N/A                   | First scenario  |
| ENSG00000272402 | Downregulated | N/A          | N/A                   | First scenario  |
| ENSG00000259961 | Downregulated | N/A          | N/A                   | First scenario  |
| ENSG00000254129 | Downregulated | N/A          | N/A                   | First scenario  |
| ENSG00000249453 | Downregulated | N/A          | N/A                   | First scenario  |
| ENSG00000259385 | Downregulated | N/A          | N/A                   | First scenario  |
| ENSG00000235279 | Downregulated | N/A          | N/A                   | First scenario  |
| ENSG00000223768 | Downregulated | N/A          | N/A                   | First scenario  |
| ENSG00000272808 | Downregulated | N/A          | N/A                   | First scenario  |
| ENSG00000232656 | Downregulated | N/A          | N/A                   | First scenario  |
| ENSG00000272444 | Downregulated | N/A          | N/A                   | First scenario  |
| ENSG00000227544 | Downregulated | N/A          | N/A                   | First scenario  |
| ENSG00000248671 | Downregulated | N/A          | N/A                   | First scenario  |
| ENSG00000263089 | Downregulated | N/A          | N/A                   | First scenario  |
| ENSG00000245008 | Downregulated | N/A          | N/A                   | First scenario  |
| ENSG00000261096 | Downregulated | N/A          | N/A                   | First scenario  |
| ENSG00000231654 | Downregulated | N/A          | N/A                   | First scenario  |
| ENSG00000272483 | Downregulated | N/A          | N/A                   | First scenario  |
| ENSG00000269161 | N/A           | -0.310970461 | 0.027942              | Second scenario |
| ENSG00000260482 | N/A           | -0.343163203 | 0.014698              | Second scenario |
| ENSG00000260880 | N/A           | -0.560905709 | 2.27x10 <sup>-5</sup> | Second scenario |
| ENSG00000251143 | N/A           | -0.432533908 | 0.001707              | Second scenario |
| ENSG00000254675 | N/A           | -0.302490088 | 0.032751              | Second scenario |
| ENSG00000235927 | N/A           | -0.284355339 | 0.045353              | Second scenario |
| ENSG00000237532 | N/A           | -0.429382284 | 0.00186               | Second scenario |
| ENSG00000260940 | N/A           | -0.398880634 | 0.004114              | Second scenario |
| ENSG00000268713 | N/A           | -0.395282743 | 0.004496              | Second scenario |
| ENSG00000273474 | N/A           | -0.424634231 | 0.002115              | Second scenario |
| ENSG00000233358 | N/A           | -0.323766141 | 0.021812              | Second scenario |
| ENSG00000227278 | N/A           | -0.398049506 | 0.004199              | Second scenario |
| ENSG00000242516 | N/A           | -0.313506658 | 0.026625              | Second scenario |
| ENSG00000232098 | N/A           | -0.30344692  | 0.032176              | Second scenario |
| ENSG00000229201 | N/A           | -0.303931119 | 0.031888              | Second scenario |
| ENSG00000272821 | N/A           | -0.438776479 | 0.001435              | Second scenario |
| ENSG00000272203 | N/A           | -0.325535284 | 0.021061              | Second scenario |
| ENSG00000257056 | N/A           | -0.312021436 | 0.02739               | Second scenario |
| ENSG00000254254 | N/A           | -0.329690922 | 0.019383              | Second scenario |
| ENSG00000272791 | N/A           | -0.378537684 | 0.006715              | Second scenario |



Table SI. Continued.

| ENSG            | Expression | PCC          | PCC.pval              | Scenario        |
|-----------------|------------|--------------|-----------------------|-----------------|
| ENSG00000100181 | N/A        | -0.592158831 | 5.90x10 <sup>-6</sup> | Second scenario |
| ENSG00000262050 | N/A        | -0.45423184  | 0.000921              | Second scenario |
| ENSG00000272669 | N/A        | -0.346932173 | 0.013575              | Second scenario |
| ENSG00000273096 | N/A        | -0.409563854 | 0.003141              | Second scenario |
| ENSG00000231601 | N/A        | -0.296863721 | 0.036305              | Second scenario |
| ENSG00000267436 | N/A        | -0.393181963 | 0.004733              | Second scenario |
| ENSG00000249941 | N/A        | -0.326067755 | 0.020839              | Second scenario |
| ENSG00000256481 | N/A        | -0.307560002 | 0.0298                | Second scenario |
| ENSG00000272829 | N/A        | -0.289017266 | 0.041787              | Second scenario |
| ENSG00000230082 | N/A        | -0.485271396 | 0.000354              | Second scenario |
| ENSG00000233421 | N/A        | -0.325152058 | 0.021222              | Second scenario |
| ENSG00000263257 | N/A        | -0.316493952 | 0.025139              | Second scenario |
| ENSG00000255052 | N/A        | -0.328636923 | 0.019797              | Second scenario |
| ENSG00000237523 | N/A        | -0.328429987 | 0.019879              | Second scenario |
| ENSG00000265743 | N/A        | -0.532595697 | 6.85x10 <sup>-5</sup> | Second scenario |
| ENSG00000228237 | N/A        | -0.295856754 | 0.036973              | Second scenario |
| ENSG00000272849 | N/A        | -0.322886845 | 0.022193              | Second scenario |
| ENSG00000254686 | N/A        | -0.331721784 | 0.018604              | Second scenario |
| ENSG00000240219 | N/A        | -0.325301504 | 0.021159              | Second scenario |
| ENSG00000263958 | N/A        | -0.708841068 | 8.40x10 <sup>-9</sup> | Second scenario |
| ENSG00000225905 | N/A        | -0.574183567 | 1.30x10 <sup>-5</sup> | Second scenario |
| ENSG00000230148 | N/A        | -0.391872612 | 0.004887              | Second scenario |
| ENSG00000245105 | N/A        | -0.531754249 | 7.07x10 <sup>-5</sup> | Second scenario |
| ENSG00000142396 | N/A        | -0.463521398 | 0.000699              | Second scenario |
| ENSG00000230063 | N/A        | -0.279435172 | 0.049383              | Second scenario |
| ENSG00000257718 | N/A        | -0.464781356 | 0.000673              | Second scenario |
| ENSG00000229591 | N/A        | -0.281369753 | 0.047765              | Second scenario |
| ENSG00000225096 | N/A        | -0.559587963 | 2.39x10 <sup>-5</sup> | Second scenario |
| ENSG00000225105 | N/A        | -0.296447593 | 0.03658               | Second scenario |
| ENSG00000261063 | N/A        | -0.323128976 | 0.022088              | Second scenario |
| ENSG00000255621 | N/A        | -0.288358899 | 0.042276              | Second scenario |
| ENSG00000260022 | N/A        | -0.332368507 | 0.018362              | Second scenario |
| ENSG00000263082 | N/A        | -0.407360778 | 0.003323              | Second scenario |
| ENSG00000240006 | N/A        | -0.30218682  | 0.032935              | Second scenario |
| ENSG00000245552 | N/A        | -0.332356668 | 0.018367              | Second scenario |
| ENSG00000238113 | N/A        | -0.284201568 | 0.045475              | Second scenario |
| ENSG00000246214 | N/A        | -0.397106687 | 0.004298              | Second scenario |
| ENSG00000269235 | N/A        | -0.350290139 | 0.012637              | Second scenario |
| ENSG00000228784 | N/A        | -0.352974068 | 0.011927              | Second scenario |
| ENSG00000226441 | N/A        | -0.313306412 | 0.026727              | Second scenario |
| ENSG00000234773 | N/A        | -0.548025797 | 3.80x10 <sup>-5</sup> | Second scenario |
| ENSG00000253527 | N/A        | -0.322118572 | 0.022531              | Second scenario |
| ENSG00000267491 | N/A        | -0.376569547 | 0.00703               | Second scenario |
| ENSG00000233644 | N/A        | -0.669156464 | 1.08x10 <sup>-7</sup> | Second scenario |
| ENSG00000267191 | N/A        | -0.701816314 | 1.36x10 <sup>-8</sup> | Second scenario |
| ENSG00000229848 | N/A        | -0.391317967 | 0.004953              | Second scenario |
| ENSG00000267640 | N/A        | -0.525200124 | 9.00x10 <sup>-5</sup> | Second scenario |
| ENSG00000259985 | N/A        | -0.509007878 | 0.00016               | Second scenario |
| ENSG00000272524 | N/A        | -0.380182586 | 0.006462              | Second scenario |
| ENSG00000260281 | N/A        | -0.484481564 | 0.000364              | Second scenario |
| ENSG00000250069 | N/A        | -0.338412852 | 0.016225              | Second scenario |
| ENSG00000260417 | N/A        | -0.581214189 | 9.61x10 <sup>-6</sup> | Second scenario |
| ENSG00000227021 | N/A        | -0.363020137 | 0.009568              | Second scenario |
| ENSG00000273137 | N/A        | -0.338896179 | 0.016064              | Second scenario |
| ENSG00000265206 | N/A        | -0.403322888 | 0.003681              | Second scenario |
| ENSG00000251040 | N/A        | -0.374226011 | 0.007422              | Second scenario |
| ENSG00000186594 | N/A        | -0.390042634 | 0.005109              | Second scenario |
| ENSG00000185904 | N/A        | -0.492153302 | 0.000283              | Second scenario |
| ENSG00000232759 | N/A        | -0.355642315 | 0.011257              | Second scenario |

Table SI. Continued.

| ENSG            | Expression | PCC          | PCC.pval              | Scenario        |
|-----------------|------------|--------------|-----------------------|-----------------|
| ENSG00000198468 | N/A        | -0.308717208 | 0.029159              | Second scenario |
| ENSG00000232930 | N/A        | -0.408472035 | 0.00323               | Second scenario |
| ENSG00000227456 | N/A        | -0.382232441 | 0.006157              | Second scenario |
| ENSG00000183242 | N/A        | -0.376020201 | 0.00712               | Second scenario |
| ENSG00000254980 | N/A        | -0.487314881 | 0.000332              | Second scenario |
| ENSG00000233430 | N/A        | -0.281936762 | 0.047299              | Second scenario |
| ENSG00000256276 | N/A        | -0.300587654 | 0.033919              | Second scenario |
| ENSG00000265888 | N/A        | -0.378120834 | 0.006781              | Second scenario |
| ENSG00000253187 | N/A        | -0.284791938 | 0.045009              | Second scenario |
| ENSG00000198106 | N/A        | -0.325484478 | 0.021082              | Second scenario |
| ENSG00000263400 | N/A        | -0.535326334 | 6.18x10 <sup>-5</sup> | Second scenario |
| ENSG00000226644 | N/A        | -0.357821305 | 0.010733              | Second scenario |
| ENSG00000238141 | N/A        | -0.441091674 | 0.001345              | Second scenario |
| ENSG00000256006 | N/A        | -0.343184022 | 0.014691              | Second scenario |
| ENSG00000229282 | N/A        | -0.367918177 | 0.008572              | Second scenario |
| ENSG00000264456 | N/A        | -0.31122736  | 0.027807              | Second scenario |
| ENSG00000267244 | N/A        | -0.601416314 | 3.86x10 <sup>-6</sup> | Second scenario |
| ENSG00000260473 | N/A        | -0.304907581 | 0.031315              | Second scenario |
| ENSG00000228503 | N/A        | -0.289917839 | 0.041125              | Second scenario |
| ENSG00000232790 | N/A        | -0.303142563 | 0.032358              | Second scenario |
| ENSG00000235597 | N/A        | -0.580857099 | 9.76x10 <sup>-6</sup> | Second scenario |
| ENSG00000256813 | N/A        | -0.302858579 | 0.032528              | Second scenario |

## B, Hypomethylated promoter

| ENSG            | Expression  | PCC          | PCC.pval               | Scenario |
|-----------------|-------------|--------------|------------------------|----------|
| ENSG00000228113 | Upregulated | -0.381867913 | 0.00621                | Both     |
| ENSG00000253704 | Upregulated | -0.331782892 | 0.018581               | Both     |
| ENSG00000247271 | Upregulated | -0.40974922  | 0.003126               | Both     |
| ENSG00000260083 | Upregulated | -0.359570661 | 0.010328               | Both     |
| ENSG00000235423 | Upregulated | -0.313322404 | 0.026719               | Both     |
| ENSG00000258711 | Upregulated | -0.35600821  | 0.011167               | Both     |
| ENSG00000242540 | Upregulated | -0.350241772 | 0.01265                | Both     |
| ENSG00000272202 | Upregulated | -0.281123064 | 0.047969               | Both     |
| ENSG00000260868 | Upregulated | -0.567563201 | 1.72x10 <sup>-5</sup>  | Both     |
| ENSG00000226835 | Upregulated | -0.399519267 | 0.004049               | Both     |
| ENSG00000267080 | Upregulated | -0.425318935 | 0.002077               | Both     |
| ENSG00000235204 | Upregulated | -0.364349519 | 0.009288               | Both     |
| ENSG00000225792 | Upregulated | -0.49036782  | 0.0003                 | Both     |
| ENSG00000234546 | Upregulated | -0.422593438 | 0.002234               | Both     |
| ENSG00000236088 | Upregulated | -0.482055487 | 0.000393               | Both     |
| ENSG00000231966 | Upregulated | -0.329593264 | 0.019421               | Both     |
| ENSG00000228031 | Upregulated | -0.351926188 | 0.0122                 | Both     |
| ENSG00000235172 | Upregulated | -0.309804285 | 0.028566               | Both     |
| ENSG00000224865 | Upregulated | -0.338253111 | 0.016279               | Both     |
| ENSG00000231789 | Upregulated | -0.28381841  | 0.045779               | Both     |
| ENSG00000245857 | Upregulated | -0.421693154 | 0.002288               | Both     |
| ENSG00000232788 | Upregulated | -0.431197685 | 0.00177                | Both     |
| ENSG00000188365 | Upregulated | -0.314719723 | 0.026013               | Both     |
| ENSG00000241269 | Upregulated | -0.422792819 | 0.002222               | Both     |
| ENSG00000269640 | Upregulated | -0.756754411 | 2.05x10 <sup>-10</sup> | Both     |
| ENSG00000117242 | Upregulated | -0.309000732 | 0.029003               | Both     |
| ENSG00000249249 | Upregulated | -0.456299021 | 0.000867               | Both     |
| ENSG00000229108 | Upregulated | -0.353465647 | 0.011801               | Both     |
| ENSG00000273341 | Upregulated | -0.375250625 | 0.007248               | Both     |
| ENSG00000251131 | Upregulated | -0.572377025 | 1.41x10 <sup>-5</sup>  | Both     |
| ENSG00000270823 | Upregulated | -0.363926055 | 0.009376               | Both     |
| ENSG00000250237 | Upregulated | -0.304224202 | 0.031715               | Both     |



Table SI. Continued.

| ENSG            | Expression  | PCC          | PCC.pval              | Scenario       |
|-----------------|-------------|--------------|-----------------------|----------------|
| ENSG00000254693 | Upregulated | -0.288166264 | 0.04242               | Both           |
| ENSG00000223382 | Upregulated | -0.352120257 | 0.012149              | Both           |
| ENSG00000265975 | Upregulated | -0.421092176 | 0.002325              | Both           |
| ENSG00000205056 | Upregulated | -0.362426092 | 0.009695              | Both           |
| ENSG00000227502 | Upregulated | -0.454499464 | 0.000914              | Both           |
| ENSG00000268001 | Upregulated | -0.537015666 | 5.80x10 <sup>-5</sup> | Both           |
| ENSG00000227214 | Upregulated | N/A          | N/A                   | First scenario |
| ENSG00000266970 | Upregulated | N/A          | N/A                   | First scenario |
| ENSG00000232388 | Upregulated | N/A          | N/A                   | First scenario |
| ENSG00000253438 | Upregulated | N/A          | N/A                   | First scenario |
| ENSG00000229267 | Upregulated | N/A          | N/A                   | First scenario |
| ENSG00000223653 | Upregulated | N/A          | N/A                   | First scenario |
| ENSG00000265688 | Upregulated | N/A          | N/A                   | First scenario |
| ENSG00000255100 | Upregulated | N/A          | N/A                   | First scenario |
| ENSG00000264772 | Upregulated | N/A          | N/A                   | First scenario |
| ENSG00000268471 | Upregulated | N/A          | N/A                   | First scenario |
| ENSG00000239569 | Upregulated | N/A          | N/A                   | First scenario |
| ENSG00000257842 | Upregulated | N/A          | N/A                   | First scenario |
| ENSG00000235545 | Upregulated | N/A          | N/A                   | First scenario |
| ENSG00000253194 | Upregulated | N/A          | N/A                   | First scenario |
| ENSG00000257660 | Upregulated | N/A          | N/A                   | First scenario |
| ENSG00000246095 | Upregulated | N/A          | N/A                   | First scenario |
| ENSG00000230695 | Upregulated | N/A          | N/A                   | First scenario |
| ENSG00000236924 | Upregulated | N/A          | N/A                   | First scenario |
| ENSG00000245025 | Upregulated | N/A          | N/A                   | First scenario |
| ENSG00000269946 | Upregulated | N/A          | N/A                   | First scenario |
| ENSG00000227128 | Upregulated | N/A          | N/A                   | First scenario |
| ENSG00000259407 | Upregulated | N/A          | N/A                   | First scenario |
| ENSG00000235078 | Upregulated | N/A          | N/A                   | First scenario |
| ENSG00000261504 | Upregulated | N/A          | N/A                   | First scenario |
| ENSG00000242797 | Upregulated | N/A          | N/A                   | First scenario |
| ENSG00000254545 | Upregulated | N/A          | N/A                   | First scenario |
| ENSG00000234753 | Upregulated | N/A          | N/A                   | First scenario |
| ENSG00000234961 | Upregulated | N/A          | N/A                   | First scenario |
| ENSG00000273004 | Upregulated | N/A          | N/A                   | First scenario |
| ENSG00000235590 | Upregulated | N/A          | N/A                   | First scenario |
| ENSG00000271966 | Upregulated | N/A          | N/A                   | First scenario |
| ENSG00000258943 | Upregulated | N/A          | N/A                   | First scenario |
| ENSG00000230262 | Upregulated | N/A          | N/A                   | First scenario |
| ENSG00000272004 | Upregulated | N/A          | N/A                   | First scenario |
| ENSG00000214719 | Upregulated | N/A          | N/A                   | First scenario |
| ENSG00000273355 | Upregulated | N/A          | N/A                   | First scenario |
| ENSG00000254662 | Upregulated | N/A          | N/A                   | First scenario |
| ENSG00000267939 | Upregulated | N/A          | N/A                   | First scenario |
| ENSG00000234899 | Upregulated | N/A          | N/A                   | First scenario |
| ENSG00000249641 | Upregulated | N/A          | N/A                   | First scenario |
| ENSG00000269288 | Upregulated | N/A          | N/A                   | First scenario |
| ENSG00000248243 | Upregulated | N/A          | N/A                   | First scenario |
| ENSG00000231441 | Upregulated | N/A          | N/A                   | First scenario |
| ENSG00000226508 | Upregulated | N/A          | N/A                   | First scenario |
| ENSG00000266835 | Upregulated | N/A          | N/A                   | First scenario |
| ENSG00000244184 | Upregulated | N/A          | N/A                   | First scenario |
| ENSG00000257379 | Upregulated | N/A          | N/A                   | First scenario |
| ENSG00000270504 | Upregulated | N/A          | N/A                   | First scenario |
| ENSG00000225077 | Upregulated | N/A          | N/A                   | First scenario |
| ENSG00000271984 | Upregulated | N/A          | N/A                   | First scenario |
| ENSG00000229043 | Upregulated | N/A          | N/A                   | First scenario |
| ENSG00000241933 | Upregulated | N/A          | N/A                   | First scenario |
| ENSG00000226051 | Upregulated | N/A          | N/A                   | First scenario |

Table SI. Continued.

| ENSG            | Expression  | PCC | PCC.pval | Scenario       |
|-----------------|-------------|-----|----------|----------------|
| ENSG00000272369 | Upregulated | N/A | N/A      | First scenario |
| ENSG00000233184 | Upregulated | N/A | N/A      | First scenario |
| ENSG00000245534 | Upregulated | N/A | N/A      | First scenario |
| ENSG00000248049 | Upregulated | N/A | N/A      | First scenario |
| ENSG00000249035 | Upregulated | N/A | N/A      | First scenario |
| ENSG00000225791 | Upregulated | N/A | N/A      | First scenario |
| ENSG00000255240 | Upregulated | N/A | N/A      | First scenario |
| ENSG00000260057 | Upregulated | N/A | N/A      | First scenario |
| ENSG00000267698 | Upregulated | N/A | N/A      | First scenario |
| ENSG00000265445 | Upregulated | N/A | N/A      | First scenario |
| ENSG00000256690 | Upregulated | N/A | N/A      | First scenario |
| ENSG00000267302 | Upregulated | N/A | N/A      | First scenario |
| ENSG00000259062 | Upregulated | N/A | N/A      | First scenario |
| ENSG00000273272 | Upregulated | N/A | N/A      | First scenario |
| ENSG00000177410 | Upregulated | N/A | N/A      | First scenario |
| ENSG00000246560 | Upregulated | N/A | N/A      | First scenario |
| ENSG00000262089 | Upregulated | N/A | N/A      | First scenario |
| ENSG00000204815 | Upregulated | N/A | N/A      | First scenario |
| ENSG00000229525 | Upregulated | N/A | N/A      | First scenario |
| ENSG00000272146 | Upregulated | N/A | N/A      | First scenario |
| ENSG00000258457 | Upregulated | N/A | N/A      | First scenario |
| ENSG00000263327 | Upregulated | N/A | N/A      | First scenario |
| ENSG00000254760 | Upregulated | N/A | N/A      | First scenario |
| ENSG00000267105 | Upregulated | N/A | N/A      | First scenario |
| ENSG00000257595 | Upregulated | N/A | N/A      | First scenario |
| ENSG00000251632 | Upregulated | N/A | N/A      | First scenario |
| ENSG00000265451 | Upregulated | N/A | N/A      | First scenario |
| ENSG00000247240 | Upregulated | N/A | N/A      | First scenario |
| ENSG00000245156 | Upregulated | N/A | N/A      | First scenario |
| ENSG00000225511 | Upregulated | N/A | N/A      | First scenario |
| ENSG00000269416 | Upregulated | N/A | N/A      | First scenario |
| ENSG00000234506 | Upregulated | N/A | N/A      | First scenario |
| ENSG00000272405 | Upregulated | N/A | N/A      | First scenario |
| ENSG00000244151 | Upregulated | N/A | N/A      | First scenario |
| ENSG00000250081 | Upregulated | N/A | N/A      | First scenario |
| ENSG00000246174 | Upregulated | N/A | N/A      | First scenario |
| ENSG00000215068 | Upregulated | N/A | N/A      | First scenario |
| ENSG00000267033 | Upregulated | N/A | N/A      | First scenario |
| ENSG00000177337 | Upregulated | N/A | N/A      | First scenario |
| ENSG00000214293 | Upregulated | N/A | N/A      | First scenario |
| ENSG00000230424 | Upregulated | N/A | N/A      | First scenario |
| ENSG00000272686 | Upregulated | N/A | N/A      | First scenario |
| ENSG00000242375 | Upregulated | N/A | N/A      | First scenario |
| ENSG00000236618 | Upregulated | N/A | N/A      | First scenario |
| ENSG00000246090 | Upregulated | N/A | N/A      | First scenario |
| ENSG00000240758 | Upregulated | N/A | N/A      | First scenario |
| ENSG00000224238 | Upregulated | N/A | N/A      | First scenario |
| ENSG00000271122 | Upregulated | N/A | N/A      | First scenario |
| ENSG00000245904 | Upregulated | N/A | N/A      | First scenario |
| ENSG00000163597 | Upregulated | N/A | N/A      | First scenario |
| ENSG00000272081 | Upregulated | N/A | N/A      | First scenario |
| ENSG00000260603 | Upregulated | N/A | N/A      | First scenario |
| ENSG00000272666 | Upregulated | N/A | N/A      | First scenario |
| ENSG00000204054 | Upregulated | N/A | N/A      | First scenario |
| ENSG00000272456 | Upregulated | N/A | N/A      | First scenario |
| ENSG00000253484 | Upregulated | N/A | N/A      | First scenario |
| ENSG00000260886 | Upregulated | N/A | N/A      | First scenario |
| ENSG00000228775 | Upregulated | N/A | N/A      | First scenario |

Table SI. Continued.

| ENSG            | Expression  | PCC | PCC.pval | Scenario       |
|-----------------|-------------|-----|----------|----------------|
| ENSG00000272288 | Upregulated | N/A | N/A      | First scenario |
| ENSG00000232940 | Upregulated | N/A | N/A      | First scenario |
| ENSG00000262001 | Upregulated | N/A | N/A      | First scenario |
| ENSG00000255198 | Upregulated | N/A | N/A      | First scenario |
| ENSG00000224391 | Upregulated | N/A | N/A      | First scenario |
| ENSG00000182165 | Upregulated | N/A | N/A      | First scenario |
| ENSG00000225528 | Upregulated | N/A | N/A      | First scenario |
| ENSG00000234741 | Upregulated | N/A | N/A      | First scenario |
| ENSG00000270084 | Upregulated | N/A | N/A      | First scenario |
| ENSG00000257167 | Upregulated | N/A | N/A      | First scenario |
| ENSG00000225265 | Upregulated | N/A | N/A      | First scenario |
| ENSG00000228801 | Upregulated | N/A | N/A      | First scenario |
| ENSG00000225721 | Upregulated | N/A | N/A      | First scenario |
| ENSG00000270194 | Upregulated | N/A | N/A      | First scenario |
| ENSG00000227028 | Upregulated | N/A | N/A      | First scenario |
| ENSG00000244586 | Upregulated | N/A | N/A      | First scenario |
| ENSG00000235121 | Upregulated | N/A | N/A      | First scenario |
| ENSG00000270160 | Upregulated | N/A | N/A      | First scenario |
| ENSG00000232021 | Upregulated | N/A | N/A      | First scenario |
| ENSG00000006062 | Upregulated | N/A | N/A      | First scenario |
| ENSG00000248187 | Upregulated | N/A | N/A      | First scenario |
| ENSG00000232485 | Upregulated | N/A | N/A      | First scenario |
| ENSG00000250786 | Upregulated | N/A | N/A      | First scenario |
| ENSG00000272491 | Upregulated | N/A | N/A      | First scenario |
| ENSG00000260352 | Upregulated | N/A | N/A      | First scenario |
| ENSG00000237928 | Upregulated | N/A | N/A      | First scenario |
| ENSG00000257303 | Upregulated | N/A | N/A      | First scenario |
| ENSG00000272269 | Upregulated | N/A | N/A      | First scenario |
| ENSG00000237595 | Upregulated | N/A | N/A      | First scenario |
| ENSG00000267201 | Upregulated | N/A | N/A      | First scenario |
| ENSG00000272502 | Upregulated | N/A | N/A      | First scenario |
| ENSG00000254887 | Upregulated | N/A | N/A      | First scenario |
| ENSG00000231365 | Upregulated | N/A | N/A      | First scenario |
| ENSG00000253929 | Upregulated | N/A | N/A      | First scenario |
| ENSG00000272282 | Upregulated | N/A | N/A      | First scenario |
| ENSG00000240497 | Upregulated | N/A | N/A      | First scenario |
| ENSG00000272540 | Upregulated | N/A | N/A      | First scenario |
| ENSG00000230747 | Upregulated | N/A | N/A      | First scenario |
| ENSG00000272758 | Upregulated | N/A | N/A      | First scenario |
| ENSG00000264672 | Upregulated | N/A | N/A      | First scenario |
| ENSG00000239922 | Upregulated | N/A | N/A      | First scenario |
| ENSG00000267131 | Upregulated | N/A | N/A      | First scenario |
| ENSG00000272865 | Upregulated | N/A | N/A      | First scenario |
| ENSG00000267282 | Upregulated | N/A | N/A      | First scenario |
| ENSG00000247311 | Upregulated | N/A | N/A      | First scenario |
| ENSG00000258177 | Upregulated | N/A | N/A      | First scenario |
| ENSG00000258675 | Upregulated | N/A | N/A      | First scenario |
| ENSG00000250629 | Upregulated | N/A | N/A      | First scenario |
| ENSG00000267439 | Upregulated | N/A | N/A      | First scenario |
| ENSG00000246130 | Upregulated | N/A | N/A      | First scenario |
| ENSG00000259514 | Upregulated | N/A | N/A      | First scenario |
| ENSG00000130600 | Upregulated | N/A | N/A      | First scenario |
| ENSG00000260156 | Upregulated | N/A | N/A      | First scenario |
| ENSG00000259768 | Upregulated | N/A | N/A      | First scenario |
| ENSG00000228741 | Upregulated | N/A | N/A      | First scenario |
| ENSG00000167355 | Upregulated | N/A | N/A      | First scenario |
| ENSG00000272142 | Upregulated | N/A | N/A      | First scenario |
| ENSG00000178977 | Upregulated | N/A | N/A      | First scenario |
| ENSG00000259705 | Upregulated | N/A | N/A      | First scenario |

Table SI. Continued.

| ENSG            | Expression  | PCC | PCC.pval | Scenario       |
|-----------------|-------------|-----|----------|----------------|
| ENSG00000227365 | Upregulated | N/A | N/A      | First scenario |
| ENSG00000260304 | Upregulated | N/A | N/A      | First scenario |
| ENSG00000203497 | Upregulated | N/A | N/A      | First scenario |
| ENSG00000253608 | Upregulated | N/A | N/A      | First scenario |
| ENSG00000247151 | Upregulated | N/A | N/A      | First scenario |
| ENSG00000271938 | Upregulated | N/A | N/A      | First scenario |
| ENSG00000244247 | Upregulated | N/A | N/A      | First scenario |
| ENSG00000261478 | Upregulated | N/A | N/A      | First scenario |
| ENSG00000262370 | Upregulated | N/A | N/A      | First scenario |
| ENSG00000245060 | Upregulated | N/A | N/A      | First scenario |
| ENSG00000260907 | Upregulated | N/A | N/A      | First scenario |
| ENSG00000204277 | Upregulated | N/A | N/A      | First scenario |
| ENSG00000223552 | Upregulated | N/A | N/A      | First scenario |
| ENSG00000227630 | Upregulated | N/A | N/A      | First scenario |
| ENSG00000223436 | Upregulated | N/A | N/A      | First scenario |
| ENSG00000272170 | Upregulated | N/A | N/A      | First scenario |
| ENSG00000223949 | Upregulated | N/A | N/A      | First scenario |
| ENSG00000230090 | Upregulated | N/A | N/A      | First scenario |
| ENSG00000267406 | Upregulated | N/A | N/A      | First scenario |
| ENSG00000269481 | Upregulated | N/A | N/A      | First scenario |
| ENSG00000230730 | Upregulated | N/A | N/A      | First scenario |
| ENSG00000258738 | Upregulated | N/A | N/A      | First scenario |
| ENSG00000234883 | Upregulated | N/A | N/A      | First scenario |
| ENSG00000236106 | Upregulated | N/A | N/A      | First scenario |
| ENSG00000229124 | Upregulated | N/A | N/A      | First scenario |
| ENSG00000236947 | Upregulated | N/A | N/A      | First scenario |
| ENSG00000267280 | Upregulated | N/A | N/A      | First scenario |
| ENSG00000262251 | Upregulated | N/A | N/A      | First scenario |
| ENSG00000248505 | Upregulated | N/A | N/A      | First scenario |
| ENSG00000260136 | Upregulated | N/A | N/A      | First scenario |
| ENSG00000266998 | Upregulated | N/A | N/A      | First scenario |
| ENSG00000224081 | Upregulated | N/A | N/A      | First scenario |
| ENSG00000253716 | Upregulated | N/A | N/A      | First scenario |
| ENSG00000236869 | Upregulated | N/A | N/A      | First scenario |
| ENSG00000225470 | Upregulated | N/A | N/A      | First scenario |
| ENSG00000270933 | Upregulated | N/A | N/A      | First scenario |
| ENSG00000261487 | Upregulated | N/A | N/A      | First scenario |
| ENSG00000251580 | Upregulated | N/A | N/A      | First scenario |
| ENSG00000227517 | Upregulated | N/A | N/A      | First scenario |
| ENSG00000272183 | Upregulated | N/A | N/A      | First scenario |
| ENSG00000255328 | Upregulated | N/A | N/A      | First scenario |
| ENSG00000231890 | Upregulated | N/A | N/A      | First scenario |
| ENSG00000225742 | Upregulated | N/A | N/A      | First scenario |
| ENSG00000233895 | Upregulated | N/A | N/A      | First scenario |
| ENSG00000153363 | Upregulated | N/A | N/A      | First scenario |
| ENSG00000267984 | Upregulated | N/A | N/A      | First scenario |
| ENSG00000269102 | Upregulated | N/A | N/A      | First scenario |
| ENSG00000237976 | Upregulated | N/A | N/A      | First scenario |
| ENSG00000237013 | Upregulated | N/A | N/A      | First scenario |
| ENSG00000260086 | Upregulated | N/A | N/A      | First scenario |
| ENSG00000225177 | Upregulated | N/A | N/A      | First scenario |
| ENSG00000261455 | Upregulated | N/A | N/A      | First scenario |
| ENSG00000254054 | Upregulated | N/A | N/A      | First scenario |
| ENSG00000272662 | Upregulated | N/A | N/A      | First scenario |
| ENSG00000204261 | Upregulated | N/A | N/A      | First scenario |
| ENSG00000233621 | Upregulated | N/A | N/A      | First scenario |
| ENSG00000269970 | Upregulated | N/A | N/A      | First scenario |
| ENSG00000256084 | Upregulated | N/A | N/A      | First scenario |
| ENSG00000248538 | Upregulated | N/A | N/A      | First scenario |



Table SI. Continued.

| ENSG            | Expression  | PCC          | PCC.pval              | Scenario        |
|-----------------|-------------|--------------|-----------------------|-----------------|
| ENSG00000250548 | Upregulated | N/A          | N/A                   | First scenario  |
| ENSG00000257219 | Upregulated | N/A          | N/A                   | First scenario  |
| ENSG00000272217 | Upregulated | N/A          | N/A                   | First scenario  |
| ENSG00000270105 | Upregulated | N/A          | N/A                   | First scenario  |
| ENSG00000241155 | Upregulated | N/A          | N/A                   | First scenario  |
| ENSG00000230943 | Upregulated | N/A          | N/A                   | First scenario  |
| ENSG00000234062 | Upregulated | N/A          | N/A                   | First scenario  |
| ENSG00000261460 | Upregulated | N/A          | N/A                   | First scenario  |
| ENSG00000231607 | Upregulated | N/A          | N/A                   | First scenario  |
| ENSG00000237886 | Upregulated | N/A          | N/A                   | First scenario  |
| ENSG00000265843 | Upregulated | N/A          | N/A                   | First scenario  |
| ENSG00000228201 | Upregulated | N/A          | N/A                   | First scenario  |
| ENSG00000231871 | Upregulated | N/A          | N/A                   | First scenario  |
| ENSG00000265666 | Upregulated | N/A          | N/A                   | First scenario  |
| ENSG00000197813 | Upregulated | N/A          | N/A                   | First scenario  |
| ENSG00000266402 | Upregulated | N/A          | N/A                   | First scenario  |
| ENSG00000254300 | Upregulated | N/A          | N/A                   | First scenario  |
| ENSG00000249906 | Upregulated | N/A          | N/A                   | First scenario  |
| ENSG00000272716 | Upregulated | N/A          | N/A                   | First scenario  |
| ENSG00000263013 | Upregulated | N/A          | N/A                   | First scenario  |
| ENSG00000251179 | Upregulated | N/A          | N/A                   | First scenario  |
| ENSG00000233654 | N/A         | -0.540530421 | 5.08x10 <sup>-5</sup> | Second scenario |
| ENSG00000228917 | N/A         | -0.458233039 | 0.000819              | Second scenario |
| ENSG00000230102 | N/A         | -0.368797303 | 0.008403              | Second scenario |
| ENSG00000238260 | N/A         | -0.342885078 | 0.014783              | Second scenario |
| ENSG00000229852 | N/A         | -0.514245226 | 0.000133              | Second scenario |
| ENSG00000271614 | N/A         | -0.44550671  | 0.001186              | Second scenario |
| ENSG00000234181 | N/A         | -0.341646622 | 0.015171              | Second scenario |
| ENSG00000237613 | N/A         | -0.290326585 | 0.040827              | Second scenario |
| ENSG00000231856 | N/A         | -0.448928463 | 0.001075              | Second scenario |
| ENSG00000258325 | N/A         | -0.358944719 | 0.010471              | Second scenario |
| ENSG00000235996 | N/A         | -0.288434261 | 0.04222               | Second scenario |
| ENSG00000259685 | N/A         | -0.302982045 | 0.032454              | Second scenario |
| ENSG00000250988 | N/A         | -0.321050058 | 0.023008              | Second scenario |
| ENSG00000227640 | N/A         | -0.282428855 | 0.046898              | Second scenario |
| ENSG00000272719 | N/A         | -0.372781328 | 0.007673              | Second scenario |
| ENSG00000272622 | N/A         | -0.304340913 | 0.031647              | Second scenario |
| ENSG00000264026 | N/A         | -0.376196672 | 0.007091              | Second scenario |
| ENSG00000261188 | N/A         | -0.369298132 | 0.008308              | Second scenario |
| ENSG00000223458 | N/A         | -0.545725287 | 4.15x10 <sup>-5</sup> | Second scenario |
| ENSG00000268231 | N/A         | -0.294928906 | 0.037598              | Second scenario |
| ENSG00000179082 | N/A         | -0.307587806 | 0.029785              | Second scenario |
| ENSG00000247095 | N/A         | -0.380683574 | 0.006386              | Second scenario |
| ENSG00000253607 | N/A         | -0.323017633 | 0.022136              | Second scenario |
| ENSG00000253871 | N/A         | -0.296316277 | 0.036667              | Second scenario |
| ENSG00000236778 | N/A         | -0.338039271 | 0.016351              | Second scenario |
| ENSG00000254499 | N/A         | -0.278798898 | 0.049924              | Second scenario |
| ENSG00000248703 | N/A         | -0.308403423 | 0.029331              | Second scenario |
| ENSG00000253647 | N/A         | -0.327612368 | 0.020207              | Second scenario |
| ENSG00000259970 | N/A         | -0.328436704 | 0.019877              | Second scenario |
| ENSG00000258949 | N/A         | -0.47704164  | 0.000461              | Second scenario |
| ENSG00000258057 | N/A         | -0.374240724 | 0.007419              | Second scenario |
| ENSG00000243276 | N/A         | -0.320623548 | 0.023201              | Second scenario |
| ENSG00000253343 | N/A         | -0.409568413 | 0.003141              | Second scenario |
| ENSG00000235620 | N/A         | -0.341778115 | 0.01513               | Second scenario |
| ENSG00000237870 | N/A         | -0.341836965 | 0.015111              | Second scenario |
| ENSG00000228598 | N/A         | -0.281699377 | 0.047494              | Second scenario |
| ENSG00000231609 | N/A         | -0.309281737 | 0.02885               | Second scenario |
| ENSG00000258479 | N/A         | -0.305790941 | 0.030803              | Second scenario |



Table SI. Continued.

| ENSG            | Expression | PCC          | PCC.pval              | Scenario        |
|-----------------|------------|--------------|-----------------------|-----------------|
| ENSG00000226390 | N/A        | -0.329192648 | 0.019578              | Second scenario |
| ENSG00000273145 | N/A        | -0.305023804 | 0.031247              | Second scenario |
| ENSG00000255007 | N/A        | -0.456921639 | 0.000851              | Second scenario |
| ENSG00000244128 | N/A        | -0.386951189 | 0.005503              | Second scenario |
| ENSG00000273090 | N/A        | -0.298513534 | 0.035231              | Second scenario |
| ENSG00000256482 | N/A        | -0.389883771 | 0.005128              | Second scenario |
| ENSG00000228317 | N/A        | -0.34231691  | 0.01496               | Second scenario |
| ENSG00000233858 | N/A        | -0.305408915 | 0.031024              | Second scenario |
| ENSG00000268833 | N/A        | -0.304878874 | 0.031332              | Second scenario |
| ENSG00000261481 | N/A        | -0.280989197 | 0.04808               | Second scenario |
| ENSG00000254787 | N/A        | -0.29897146  | 0.034938              | Second scenario |
| ENSG00000234494 | N/A        | -0.29177232  | 0.039789              | Second scenario |
| ENSG00000267629 | N/A        | -0.290134044 | 0.040967              | Second scenario |
| ENSG00000233016 | N/A        | -0.368003741 | 0.008555              | Second scenario |
| ENSG00000264569 | N/A        | -0.385134349 | 0.005747              | Second scenario |
| ENSG00000248986 | N/A        | -0.344305249 | 0.014349              | Second scenario |
| ENSG00000223469 | N/A        | -0.377551353 | 0.006872              | Second scenario |
| ENSG00000236677 | N/A        | -0.279481861 | 0.049343              | Second scenario |
| ENSG00000270021 | N/A        | -0.416231421 | 0.002643              | Second scenario |
| ENSG00000234432 | N/A        | -0.350020741 | 0.01271               | Second scenario |
| ENSG00000261803 | N/A        | -0.39114045  | 0.004975              | Second scenario |
| ENSG00000229980 | N/A        | -0.427294526 | 0.001969              | Second scenario |
| ENSG00000249786 | N/A        | -0.34691528  | 0.013579              | Second scenario |
| ENSG00000225793 | N/A        | -0.357237028 | 0.010871              | Second scenario |
| ENSG00000170919 | N/A        | -0.439207595 | 0.001418              | Second scenario |
| ENSG00000231953 | N/A        | -0.361733382 | 0.009846              | Second scenario |
| ENSG00000271659 | N/A        | -0.366159812 | 0.008918              | Second scenario |
| ENSG00000257696 | N/A        | -0.409511943 | 0.003145              | Second scenario |
| ENSG00000238197 | N/A        | -0.475526019 | 0.000483              | Second scenario |
| ENSG00000224914 | N/A        | -0.633548619 | 7.88x10 <sup>-7</sup> | Second scenario |
| ENSG00000237517 | N/A        | -0.334985326 | 0.017409              | Second scenario |
| ENSG00000264212 | N/A        | -0.308667495 | 0.029186              | Second scenario |
| ENSG00000254654 | N/A        | -0.41447588  | 0.002767              | Second scenario |
| ENSG00000259840 | N/A        | -0.470601142 | 0.000563              | Second scenario |
| ENSG00000273473 | N/A        | -0.395700534 | 0.00445               | Second scenario |
| ENSG00000231918 | N/A        | -0.292745565 | 0.039103              | Second scenario |
| ENSG00000226200 | N/A        | -0.341962358 | 0.015072              | Second scenario |
| ENSG00000226920 | N/A        | -0.369018621 | 0.008361              | Second scenario |
| ENSG00000254461 | N/A        | -0.290538975 | 0.040673              | Second scenario |
| ENSG00000237943 | N/A        | -0.285772141 | 0.044244              | Second scenario |
| ENSG00000272079 | N/A        | -0.325372496 | 0.021129              | Second scenario |
| ENSG00000249456 | N/A        | -0.340413177 | 0.015566              | Second scenario |
| ENSG00000238058 | N/A        | -0.331474147 | 0.018698              | Second scenario |
| ENSG00000259416 | N/A        | -0.31785248  | 0.024487              | Second scenario |
| ENSG00000266981 | N/A        | -0.32645281  | 0.02068               | Second scenario |
| ENSG00000175773 | N/A        | -0.471131536 | 0.000554              | Second scenario |
| ENSG00000260710 | N/A        | -0.332831171 | 0.018191              | Second scenario |
| ENSG00000235652 | N/A        | -0.322495285 | 0.022365              | Second scenario |
| ENSG00000262766 | N/A        | -0.295009925 | 0.037543              | Second scenario |
| ENSG00000250012 | N/A        | -0.408292431 | 0.003245              | Second scenario |
| ENSG00000260927 | N/A        | -0.44931697  | 0.001063              | Second scenario |
| ENSG00000260464 | N/A        | -0.317210757 | 0.024794              | Second scenario |
| ENSG00000261065 | N/A        | -0.31768799  | 0.024566              | Second scenario |
| ENSG00000260793 | N/A        | -0.471143429 | 0.000554              | Second scenario |
| ENSG00000268061 | N/A        | -0.325593341 | 0.021037              | Second scenario |
| ENSG00000260630 | N/A        | -0.303709936 | 0.032019              | Second scenario |
| ENSG00000215447 | N/A        | -0.356626226 | 0.011018              | Second scenario |
| ENSG00000248996 | N/A        | -0.382308663 | 0.006146              | Second scenario |
| ENSG00000261420 | N/A        | -0.299963983 | 0.034309              | Second scenario |

Table SI. Continued.

| ENSG            | Expression | PCC          | PCC.pval              | Scenario        |
|-----------------|------------|--------------|-----------------------|-----------------|
| ENSG00000257878 | N/A        | -0.419873022 | 0.002401              | Second scenario |
| ENSG00000235288 | N/A        | -0.330217195 | 0.019178              | Second scenario |
| ENSG00000233730 | N/A        | -0.400082125 | 0.003992              | Second scenario |
| ENSG00000273066 | N/A        | -0.384719748 | 0.005804              | Second scenario |
| ENSG00000261071 | N/A        | -0.324836776 | 0.021355              | Second scenario |
| ENSG00000267746 | N/A        | -0.426373639 | 0.002018              | Second scenario |
| ENSG00000234676 | N/A        | -0.422598122 | 0.002234              | Second scenario |
| ENSG00000261996 | N/A        | -0.298876587 | 0.034998              | Second scenario |
| ENSG00000234290 | N/A        | -0.383421677 | 0.005986              | Second scenario |
| ENSG00000232835 | N/A        | -0.33944937  | 0.015881              | Second scenario |
| ENSG00000231092 | N/A        | -0.352240011 | 0.012118              | Second scenario |
| ENSG00000237687 | N/A        | -0.525016885 | 9.06x10 <sup>-5</sup> | Second scenario |
| ENSG00000268584 | N/A        | -0.327616005 | 0.020206              | Second scenario |
| ENSG00000240859 | N/A        | -0.39186132  | 0.004888              | Second scenario |
| ENSG00000250365 | N/A        | -0.326008264 | 0.020864              | Second scenario |
| ENSG00000235954 | N/A        | -0.287510984 | 0.042913              | Second scenario |
| ENSG00000224595 | N/A        | -0.300270468 | 0.034117              | Second scenario |
| ENSG00000260805 | N/A        | -0.306115097 | 0.030617              | Second scenario |
| ENSG00000257433 | N/A        | -0.445282715 | 0.001194              | Second scenario |
| ENSG00000269898 | N/A        | -0.295766804 | 0.037033              | Second scenario |
| ENSG00000229901 | N/A        | -0.284872494 | 0.044946              | Second scenario |
| ENSG00000236935 | N/A        | -0.299089995 | 0.034862              | Second scenario |
| ENSG00000234855 | N/A        | -0.342871166 | 0.014788              | Second scenario |
| ENSG00000255745 | N/A        | -0.427455038 | 0.00196               | Second scenario |
| ENSG00000226386 | N/A        | -0.405724971 | 0.003464              | Second scenario |
| ENSG00000254862 | N/A        | -0.439413244 | 0.00141               | Second scenario |
| ENSG00000249697 | N/A        | -0.320587083 | 0.023218              | Second scenario |
| ENSG00000270562 | N/A        | -0.299254273 | 0.034757              | Second scenario |
| ENSG00000254422 | N/A        | -0.318517109 | 0.024174              | Second scenario |
| ENSG00000269906 | N/A        | -0.368173707 | 0.008522              | Second scenario |
| ENSG00000255568 | N/A        | -0.319323191 | 0.023797              | Second scenario |
| ENSG00000258383 | N/A        | -0.329123552 | 0.019605              | Second scenario |
| ENSG00000261716 | N/A        | -0.29344197  | 0.038617              | Second scenario |
| ENSG00000272880 | N/A        | -0.375847102 | 0.007149              | Second scenario |
| ENSG00000184274 | N/A        | -0.336452189 | 0.016894              | Second scenario |
| ENSG00000255571 | N/A        | -0.322378078 | 0.022417              | Second scenario |
| ENSG00000235919 | N/A        | -0.365847138 | 0.008981              | Second scenario |
| ENSG00000261439 | N/A        | -0.308535482 | 0.029259              | Second scenario |
| ENSG00000204241 | N/A        | -0.487321864 | 0.000332              | Second scenario |
| ENSG00000230523 | N/A        | -0.300561725 | 0.033935              | Second scenario |
| ENSG00000187904 | N/A        | -0.323770999 | 0.02181               | Second scenario |
| ENSG00000261898 | N/A        | -0.296312259 | 0.036669              | Second scenario |
| ENSG00000232874 | N/A        | -0.279396494 | 0.049416              | Second scenario |
| ENSG00000264577 | N/A        | -0.284615683 | 0.045148              | Second scenario |
| ENSG00000236740 | N/A        | -0.295958598 | 0.036905              | Second scenario |
| ENSG00000229913 | N/A        | -0.487734103 | 0.000327              | Second scenario |
| ENSG00000270640 | N/A        | -0.381626239 | 0.006246              | Second scenario |
| ENSG00000253130 | N/A        | -0.40093974  | 0.003908              | Second scenario |
| ENSG00000271811 | N/A        | -0.296840831 | 0.03632               | Second scenario |
| ENSG00000253774 | N/A        | -0.40735185  | 0.003324              | Second scenario |
| ENSG00000228526 | N/A        | -0.318523108 | 0.024171              | Second scenario |
| ENSG00000226581 | N/A        | -0.594961373 | 5.20x10 <sup>-6</sup> | Second scenario |
| ENSG00000255427 | N/A        | -0.29627991  | 0.036691              | Second scenario |
| ENSG00000241054 | N/A        | -0.302537275 | 0.032722              | Second scenario |
| ENSG00000273011 | N/A        | -0.290081438 | 0.041006              | Second scenario |
| ENSG00000266708 | N/A        | -0.345566475 | 0.013973              | Second scenario |
| ENSG00000230309 | N/A        | -0.282317604 | 0.046988              | Second scenario |
| ENSG00000226235 | N/A        | -0.321516271 | 0.022799              | Second scenario |
| ENSG00000258857 | N/A        | -0.425216469 | 0.002082              | Second scenario |

Table SI. Continued.

| ENSG            | Expression | PCC          | PCC.pval              | Scenario        |
|-----------------|------------|--------------|-----------------------|-----------------|
| ENSG00000260460 | N/A        | -0.517100288 | 0.000121              | Second scenario |
| ENSG00000253613 | N/A        | -0.403046096 | 0.003707              | Second scenario |
| ENSG00000227589 | N/A        | -0.311404208 | 0.027713              | Second scenario |
| ENSG00000256609 | N/A        | -0.449469501 | 0.001059              | Second scenario |
| ENSG00000260411 | N/A        | -0.330199468 | 0.019185              | Second scenario |
| ENSG00000229953 | N/A        | -0.486261524 | 0.000343              | Second scenario |
| ENSG00000229274 | N/A        | -0.282190016 | 0.047092              | Second scenario |
| ENSG00000243799 | N/A        | -0.388830437 | 0.00526               | Second scenario |
| ENSG00000228544 | N/A        | -0.356491167 | 0.01105               | Second scenario |
| ENSG00000238005 | N/A        | -0.566175142 | 1.82x10 <sup>-5</sup> | Second scenario |
| ENSG00000260011 | N/A        | -0.427412782 | 0.001963              | Second scenario |
| ENSG00000258903 | N/A        | -0.29534448  | 0.037317              | Second scenario |
| ENSG00000253553 | N/A        | -0.434328963 | 0.001624              | Second scenario |
| ENSG00000271009 | N/A        | -0.31524777  | 0.02575               | Second scenario |
| ENSG00000226143 | N/A        | -0.289307645 | 0.041572              | Second scenario |
| ENSG00000237027 | N/A        | -0.33042145  | 0.019099              | Second scenario |
| ENSG00000257588 | N/A        | -0.472631442 | 0.000529              | Second scenario |
| ENSG00000271474 | N/A        | -0.33974681  | 0.015783              | Second scenario |
| ENSG00000255750 | N/A        | -0.278791759 | 0.049931              | Second scenario |
| ENSG00000236641 | N/A        | -0.366225355 | 0.008905              | Second scenario |
| ENSG00000259666 | N/A        | -0.413348396 | 0.002849              | Second scenario |
| ENSG00000273406 | N/A        | -0.412443355 | 0.002917              | Second scenario |
| ENSG00000257022 | N/A        | -0.29007598  | 0.041009              | Second scenario |
| ENSG00000261202 | N/A        | -0.401364367 | 0.003867              | Second scenario |
| ENSG00000260978 | N/A        | -0.612656639 | 2.26x10 <sup>-6</sup> | Second scenario |
| ENSG00000230918 | N/A        | -0.571011543 | 1.49x10 <sup>-5</sup> | Second scenario |
| ENSG00000231421 | N/A        | -0.283078419 | 0.046372              | Second scenario |
| ENSG00000237429 | N/A        | -0.401279378 | 0.003875              | Second scenario |
| ENSG00000233791 | N/A        | -0.3278796   | 0.0201                | Second scenario |
| ENSG00000226363 | N/A        | -0.329350478 | 0.019516              | Second scenario |
| ENSG00000240868 | N/A        | -0.295538413 | 0.037186              | Second scenario |
| ENSG00000259720 | N/A        | -0.290091866 | 0.040998              | Second scenario |
| ENSG00000221817 | N/A        | -0.299425915 | 0.034649              | Second scenario |
| ENSG00000241679 | N/A        | -0.316419142 | 0.025176              | Second scenario |
| ENSG00000261706 | N/A        | -0.28340223  | 0.046112              | Second scenario |
| ENSG00000260403 | N/A        | -0.352054874 | 0.012166              | Second scenario |
| ENSG00000233633 | N/A        | -0.337939011 | 0.016385              | Second scenario |
| ENSG00000263072 | N/A        | -0.423939077 | 0.002155              | Second scenario |
| ENSG00000263301 | N/A        | -0.329400105 | 0.019496              | Second scenario |
| ENSG00000257475 | N/A        | -0.285272389 | 0.044633              | Second scenario |
| ENSG00000273032 | N/A        | -0.298208317 | 0.035428              | Second scenario |
| ENSG00000228251 | N/A        | -0.419302158 | 0.002438              | Second scenario |
| ENSG00000230749 | N/A        | -0.546287059 | 4.06x10 <sup>-5</sup> | Second scenario |
| ENSG00000272788 | N/A        | -0.291301381 | 0.040125              | Second scenario |
| ENSG00000229160 | N/A        | -0.361638959 | 0.009866              | Second scenario |
| ENSG00000254443 | N/A        | -0.293819016 | 0.038357              | Second scenario |
| ENSG00000254528 | N/A        | -0.332693626 | 0.018241              | Second scenario |
| ENSG00000261703 | N/A        | -0.369002077 | 0.008364              | Second scenario |
| ENSG00000267304 | N/A        | -0.364025531 | 0.009356              | Second scenario |
| ENSG00000225208 | N/A        | -0.575576036 | 1.23x10 <sup>-5</sup> | Second scenario |
| ENSG00000261569 | N/A        | -0.385849681 | 0.00565               | Second scenario |
| ENSG00000248567 | N/A        | -0.296192992 | 0.036749              | Second scenario |
| ENSG00000260629 | N/A        | -0.450233708 | 0.001035              | Second scenario |
| ENSG00000260345 | N/A        | -0.344057941 | 0.014424              | Second scenario |
| ENSG00000259564 | N/A        | -0.294946387 | 0.037586              | Second scenario |
| ENSG00000226548 | N/A        | -0.278839683 | 0.04989               | Second scenario |
| ENSG00000267727 | N/A        | -0.308098852 | 0.0295                | Second scenario |
| ENSG00000254632 | N/A        | -0.343018255 | 0.014742              | Second scenario |
| ENSG00000227947 | N/A        | -0.419858131 | 0.002402              | Second scenario |

Table SI. Continued.

| ENSG            | Expression | PCC          | PCC.pval              | Scenario        |
|-----------------|------------|--------------|-----------------------|-----------------|
| ENSG00000236394 | N/A        | -0.316453043 | 0.025159              | Second scenario |
| ENSG00000229774 | N/A        | -0.311118146 | 0.027864              | Second scenario |
| ENSG00000255317 | N/A        | -0.432292703 | 0.001718              | Second scenario |
| ENSG00000233854 | N/A        | -0.293134854 | 0.038831              | Second scenario |
| ENSG00000271781 | N/A        | -0.317554436 | 0.024629              | Second scenario |
| ENSG00000273387 | N/A        | -0.384323401 | 0.005859              | Second scenario |
| ENSG00000248925 | N/A        | -0.315832302 | 0.025462              | Second scenario |
| ENSG00000256995 | N/A        | -0.307113861 | 0.03005               | Second scenario |
| ENSG00000253351 | N/A        | -0.299722478 | 0.034461              | Second scenario |
| ENSG00000258088 | N/A        | -0.459969621 | 0.000777              | Second scenario |
| ENSG00000186369 | N/A        | -0.433583934 | 0.001658              | Second scenario |
| ENSG00000231064 | N/A        | -0.302659549 | 0.032648              | Second scenario |
| ENSG00000224814 | N/A        | -0.400664701 | 0.003935              | Second scenario |
| ENSG00000261126 | N/A        | -0.309548854 | 0.028705              | Second scenario |
| ENSG00000258121 | N/A        | -0.493714134 | 0.000269              | Second scenario |
| ENSG00000254291 | N/A        | -0.279571784 | 0.049267              | Second scenario |
| ENSG00000232354 | N/A        | -0.3570583   | 0.010914              | Second scenario |
| ENSG00000272982 | N/A        | -0.288703489 | 0.042019              | Second scenario |
| ENSG00000273221 | N/A        | -0.288703489 | 0.042019              | Second scenario |
| ENSG00000261475 | N/A        | -0.320791681 | 0.023125              | Second scenario |
| ENSG00000224842 | N/A        | -0.299396473 | 0.034667              | Second scenario |
| ENSG00000227039 | N/A        | -0.338894523 | 0.016064              | Second scenario |
| ENSG00000256814 | N/A        | -0.398420446 | 0.004161              | Second scenario |
| ENSG00000230372 | N/A        | -0.293353861 | 0.038678              | Second scenario |
| ENSG00000270403 | N/A        | -0.402835363 | 0.003727              | Second scenario |
| ENSG00000229196 | N/A        | -0.530932672 | 7.29x10 <sup>-5</sup> | Second scenario |
| ENSG00000230530 | N/A        | -0.299363465 | 0.034688              | Second scenario |
| ENSG00000236301 | N/A        | -0.287472794 | 0.042942              | Second scenario |
| ENSG00000235119 | N/A        | -0.403793742 | 0.003638              | Second scenario |
| ENSG00000223548 | N/A        | -0.446114541 | 0.001166              | Second scenario |
| ENSG00000271871 | N/A        | -0.436278547 | 0.001539              | Second scenario |
| ENSG00000235785 | N/A        | -0.306858732 | 0.030194              | Second scenario |
| ENSG00000230866 | N/A        | -0.288039654 | 0.042515              | Second scenario |
| ENSG00000215159 | N/A        | -0.29504438  | 0.03752               | Second scenario |
| ENSG00000231138 | N/A        | -0.395503743 | 0.004472              | Second scenario |
| ENSG00000259624 | N/A        | -0.463619952 | 0.000697              | Second scenario |
| ENSG00000272139 | N/A        | -0.431818701 | 0.001741              | Second scenario |
| ENSG00000253894 | N/A        | -0.334207018 | 0.017688              | Second scenario |
| ENSG00000249106 | N/A        | -0.47826928  | 0.000443              | Second scenario |
| ENSG00000269919 | N/A        | -0.386248954 | 0.005597              | Second scenario |
| ENSG00000224243 | N/A        | -0.327640503 | 0.020196              | Second scenario |
| ENSG00000259783 | N/A        | -0.301045984 | 0.033634              | Second scenario |
| ENSG00000241101 | N/A        | -0.409797331 | 0.003123              | Second scenario |
| ENSG00000259319 | N/A        | -0.311360849 | 0.027736              | Second scenario |
| ENSG00000229647 | N/A        | -0.591543373 | 6.07x10 <sup>-6</sup> | Second scenario |
| ENSG00000273328 | N/A        | -0.291802708 | 0.039768              | Second scenario |
| ENSG00000228838 | N/A        | -0.427160564 | 0.001976              | Second scenario |
| ENSG00000215117 | N/A        | -0.334496606 | 0.017584              | Second scenario |
| ENSG00000204092 | N/A        | -0.331876351 | 0.018546              | Second scenario |
| ENSG00000255202 | N/A        | -0.345488198 | 0.013996              | Second scenario |
| ENSG00000273006 | N/A        | -0.315806967 | 0.025475              | Second scenario |
| ENSG00000259457 | N/A        | -0.340241436 | 0.015622              | Second scenario |
| ENSG00000232977 | N/A        | -0.377076681 | 0.006948              | Second scenario |
| ENSG00000254519 | N/A        | -0.340831653 | 0.015431              | Second scenario |
| ENSG00000226526 | N/A        | -0.289767086 | 0.041235              | Second scenario |
| ENSG00000255491 | N/A        | -0.311432242 | 0.027699              | Second scenario |
| ENSG00000273449 | N/A        | -0.360235621 | 0.010178              | Second scenario |
| ENSG00000225819 | N/A        | -0.284128636 | 0.045533              | Second scenario |
| ENSG00000257228 | N/A        | -0.367143218 | 0.008723              | Second scenario |



Table SI. Continued.

| ENSG            | Expression | PCC          | PCC.pval              | Scenario        |
|-----------------|------------|--------------|-----------------------|-----------------|
| ENSG00000260182 | N/A        | -0.323601151 | 0.021883              | Second scenario |
| ENSG00000237705 | N/A        | -0.358756965 | 0.010515              | Second scenario |
| ENSG00000225331 | N/A        | -0.361802699 | 0.00983               | Second scenario |
| ENSG00000233554 | N/A        | -0.531430564 | 7.16x10 <sup>-5</sup> | Second scenario |
| ENSG00000260496 | N/A        | -0.316054872 | 0.025353              | Second scenario |
| ENSG00000254571 | N/A        | -0.314026425 | 0.026361              | Second scenario |
| ENSG00000237993 | N/A        | -0.293320304 | 0.038702              | Second scenario |
| ENSG00000259521 | N/A        | -0.352747548 | 0.011986              | Second scenario |
| ENSG00000256546 | N/A        | -0.425197379 | 0.002083              | Second scenario |
| ENSG00000242349 | N/A        | -0.283125801 | 0.046334              | Second scenario |
| ENSG00000236426 | N/A        | -0.335651563 | 0.017174              | Second scenario |
| ENSG00000237520 | N/A        | -0.527014495 | 8.42x10 <sup>-5</sup> | Second scenario |
| ENSG00000258422 | N/A        | -0.315819202 | 0.025469              | Second scenario |
| ENSG00000238164 | N/A        | -0.433598044 | 0.001657              | Second scenario |
| ENSG00000273472 | N/A        | -0.42542004  | 0.002071              | Second scenario |
| ENSG00000226181 | N/A        | -0.314968965 | 0.025889              | Second scenario |
| ENSG00000254942 | N/A        | -0.399752565 | 0.004025              | Second scenario |
| ENSG00000236874 | N/A        | -0.348548319 | 0.013116              | Second scenario |
| ENSG00000256504 | N/A        | -0.288130055 | 0.042447              | Second scenario |
| ENSG00000260682 | N/A        | -0.342889338 | 0.014782              | Second scenario |
| ENSG00000233978 | N/A        | -0.334384171 | 0.017624              | Second scenario |
| ENSG00000230555 | N/A        | -0.556065158 | 2.76x10 <sup>-5</sup> | Second scenario |
| ENSG00000273149 | N/A        | -0.309568511 | 0.028694              | Second scenario |
| ENSG00000254239 | N/A        | -0.309018709 | 0.028993              | Second scenario |
| ENSG00000270112 | N/A        | -0.572405117 | 1.40x10 <sup>-5</sup> | Second scenario |
| ENSG00000268618 | N/A        | -0.428798271 | 0.00189               | Second scenario |
| ENSG00000272354 | N/A        | -0.32673423  | 0.020565              | Second scenario |
| ENSG00000272370 | N/A        | -0.298013816 | 0.035553              | Second scenario |
| ENSG00000255680 | N/A        | -0.363918849 | 0.009378              | Second scenario |
| ENSG00000256139 | N/A        | -0.583851306 | 8.56x10 <sup>-6</sup> | Second scenario |
| ENSG00000241457 | N/A        | -0.500088862 | 0.000217              | Second scenario |
| ENSG00000250341 | N/A        | -0.368406426 | 0.008477              | Second scenario |
| ENSG00000237750 | N/A        | -0.310802893 | 0.028031              | Second scenario |
| ENSG00000261648 | N/A        | -0.333267606 | 0.01803               | Second scenario |
| ENSG00000272701 | N/A        | -0.347149397 | 0.013512              | Second scenario |
| ENSG00000233223 | N/A        | -0.333057463 | 0.018107              | Second scenario |
| ENSG00000225914 | N/A        | -0.460740661 | 0.00076               | Second scenario |
| ENSG00000261685 | N/A        | -0.434294824 | 0.001626              | Second scenario |
| ENSG00000244161 | N/A        | -0.318065021 | 0.024387              | Second scenario |
| ENSG00000227403 | N/A        | -0.493255669 | 0.000273              | Second scenario |
| ENSG00000256427 | N/A        | -0.379631852 | 0.006546              | Second scenario |
| ENSG00000250407 | N/A        | -0.400997355 | 0.003902              | Second scenario |
| ENSG00000236358 | N/A        | -0.377783714 | 0.006834              | Second scenario |
| ENSG00000250379 | N/A        | -0.400800522 | 0.003922              | Second scenario |
| ENSG00000238212 | N/A        | -0.356411959 | 0.011069              | Second scenario |
| ENSG00000205866 | N/A        | -0.314872264 | 0.025937              | Second scenario |
| ENSG00000223678 | N/A        | -0.304339435 | 0.031647              | Second scenario |
| ENSG00000265749 | N/A        | -0.297862118 | 0.035652              | Second scenario |
| ENSG00000255480 | N/A        | -0.345406137 | 0.01402               | Second scenario |
| ENSG00000229301 | N/A        | -0.303177238 | 0.032337              | Second scenario |
| ENSG00000236449 | N/A        | -0.478509509 | 0.00044               | Second scenario |
| ENSG00000231173 | N/A        | -0.281360765 | 0.047772              | Second scenario |
| ENSG00000224347 | N/A        | -0.281132043 | 0.047961              | Second scenario |
| ENSG00000254556 | N/A        | -0.388043644 | 0.005361              | Second scenario |
| ENSG00000273396 | N/A        | -0.356506248 | 0.011046              | Second scenario |
| ENSG00000239921 | N/A        | -0.338185717 | 0.016301              | Second scenario |
| ENSG00000271943 | N/A        | -0.473474027 | 0.000515              | Second scenario |
| ENSG00000271991 | N/A        | -0.287876433 | 0.042637              | Second scenario |
| ENSG00000258520 | N/A        | -0.31281287  | 0.02698               | Second scenario |



Table SI. Continued.

| ENSG            | Expression | PCC          | PCC.pval              | Scenario        |
|-----------------|------------|--------------|-----------------------|-----------------|
| ENSG00000260570 | N/A        | -0.374690564 | 0.007343              | Second scenario |
| ENSG00000237341 | N/A        | -0.30951966  | 0.028721              | Second scenario |
| ENSG00000250929 | N/A        | -0.376001664 | 0.007123              | Second scenario |
| ENSG00000268677 | N/A        | -0.342831752 | 0.0148                | Second scenario |
| ENSG00000233936 | N/A        | -0.289179395 | 0.041667              | Second scenario |
| ENSG00000266100 | N/A        | -0.366218112 | 0.008907              | Second scenario |
| ENSG00000238160 | N/A        | -0.321087826 | 0.022991              | Second scenario |
| ENSG00000264486 | N/A        | -0.315747382 | 0.025504              | Second scenario |
| ENSG00000258748 | N/A        | -0.2920665   | 0.039581              | Second scenario |
| ENSG00000261384 | N/A        | -0.313792014 | 0.02648               | Second scenario |
| ENSG00000273289 | N/A        | -0.329514571 | 0.019451              | Second scenario |
| ENSG00000264735 | N/A        | -0.291781915 | 0.039782              | Second scenario |
| ENSG00000230733 | N/A        | -0.3694674   | 0.008276              | Second scenario |
| ENSG00000262468 | N/A        | -0.326780117 | 0.020546              | Second scenario |
| ENSG00000225750 | N/A        | -0.465194574 | 0.000664              | Second scenario |
| ENSG00000254568 | N/A        | -0.439248594 | 0.001416              | Second scenario |
| ENSG00000269901 | N/A        | -0.312820577 | 0.026976              | Second scenario |
| ENSG00000270761 | N/A        | -0.490837251 | 0.000296              | Second scenario |
| ENSG00000272338 | N/A        | -0.280793185 | 0.048242              | Second scenario |
| ENSG00000255451 | N/A        | -0.484575332 | 0.000362              | Second scenario |
| ENSG00000225761 | N/A        | -0.340695367 | 0.015475              | Second scenario |
| ENSG00000273293 | N/A        | -0.471272673 | 0.000551              | Second scenario |
| ENSG00000225472 | N/A        | -0.398293089 | 0.004174              | Second scenario |
| ENSG00000261659 | N/A        | -0.355472696 | 0.011298              | Second scenario |
| ENSG00000227256 | N/A        | -0.281682977 | 0.047507              | Second scenario |
| ENSG00000263126 | N/A        | -0.330264177 | 0.01916               | Second scenario |
| ENSG00000256204 | N/A        | -0.330591922 | 0.019034              | Second scenario |
| ENSG00000260030 | N/A        | -0.357033448 | 0.01092               | Second scenario |
| ENSG00000250218 | N/A        | -0.297777605 | 0.035707              | Second scenario |
| ENSG00000230074 | N/A        | -0.414047853 | 0.002798              | Second scenario |
| ENSG00000245522 | N/A        | -0.298431612 | 0.035284              | Second scenario |
| ENSG00000224272 | N/A        | -0.345386924 | 0.014026              | Second scenario |
| ENSG00000271941 | N/A        | -0.354596009 | 0.011516              | Second scenario |
| ENSG00000231633 | N/A        | -0.335094128 | 0.017371              | Second scenario |
| ENSG00000228735 | N/A        | -0.425291407 | 0.002078              | Second scenario |
| ENSG00000237371 | N/A        | -0.280331115 | 0.048628              | Second scenario |
| ENSG00000227306 | N/A        | -0.42005669  | 0.00239               | Second scenario |
| ENSG00000259553 | N/A        | -0.336627784 | 0.016833              | Second scenario |
| ENSG00000271065 | N/A        | -0.328574552 | 0.019822              | Second scenario |
| ENSG00000272218 | N/A        | -0.515879673 | 0.000126              | Second scenario |
| ENSG00000241313 | N/A        | -0.531729028 | 7.08x10 <sup>-5</sup> | Second scenario |
| ENSG00000262160 | N/A        | -0.352827621 | 0.011965              | Second scenario |
| ENSG00000271398 | N/A        | -0.348484853 | 0.013134              | Second scenario |
| ENSG00000253302 | N/A        | -0.288729086 | 0.042                 | Second scenario |
| ENSG00000234148 | N/A        | -0.36386497  | 0.009389              | Second scenario |
| ENSG00000228235 | N/A        | -0.303389913 | 0.03221               | Second scenario |
| ENSG00000229776 | N/A        | -0.287265579 | 0.043099              | Second scenario |

Table SII. List of all prognostic methylation-mediated lncRNA binary tuples.

| A, Hypermethylated |                 |               |             |                             |                            |
|--------------------|-----------------|---------------|-------------|-----------------------------|----------------------------|
| lncRNA             | mRNA            | lncRNA.symbol | mRNA.symbol | survival.pval<br>(training) | survival.pval<br>(testing) |
| ENSG00000181800    | ENSG00000165288 | CELF2-AS1     | BRWD3       | 0.016279914                 | 0.007698346                |
| ENSG00000223768    | ENSG00000160867 | LINC00205     | FGFR4       | 0.043604201                 | 0.001249383                |
| ENSG00000227544    | ENSG00000050165 | AC018647.3    | DKK3        | 0.043900588                 | 4.21x10 <sup>-5</sup>      |
| ENSG00000253106    | ENSG00000171681 | RP11-158K1.3  | ATF7IP      | 0.024244489                 | 0.010240916                |
| ENSG00000257913    | ENSG00000221972 | RP11-386G11.5 | C3orf36     | 0.005020359                 | 0.001445171                |
| ENSG00000257913    | ENSG00000198910 | RP11-386G11.5 | L1CAM       | 0.038556041                 | 0.044160603                |
| ENSG00000260837    | ENSG00000129159 | RP11-434B12.1 | KCNC1       | 0.006796077                 | 4.21x10 <sup>-5</sup>      |
| ENSG00000260837    | ENSG00000145990 | RP11-434B12.1 | GFOD1       | 0.0427889                   | 4.21x10 <sup>-5</sup>      |
| ENSG00000261096    | ENSG00000064042 | RP11-690I21.2 | LIMCH1      | 0.043504198                 | 0.010043398                |
| ENSG00000261101    | ENSG00000165288 | RP4-545K15.5  | BRWD3       | 0.037112213                 | 0.029456683                |
| ENSG00000272335    | ENSG00000175054 | RP11-53O19.3  | ATR         | 0.010109216                 | 0.003619444                |
| ENSG00000272335    | ENSG00000168702 | RP11-53O19.3  | LRP1B       | 0.040848177                 | 0.028918651                |
| ENSG00000273156    | ENSG00000138759 | RP11-127B20.2 | FRAS1       | 0.010446727                 | 0.036575159                |
| B, Hypomethylated  |                 |               |             |                             |                            |
| lncRNA             | mRNA            | lncRNA.symbol | mRNA.symbol | survival.pval<br>(training) | survival.pval<br>(testing) |
| ENSG00000130600    | ENSG00000117308 | H19           | GALE        | 0.036802559                 | 0.001694894                |
| ENSG00000153363    | ENSG00000154710 | LINC00467     | RABGEF1     | 0.010679689                 | 0.030626025                |
| ENSG00000163597    | ENSG00000090432 | SNHG16        | MUL1        | 0.022712469                 | 0.041709452                |
| ENSG00000163597    | ENSG00000119285 | SNHG16        | HEATR1      | 0.037941144                 | 0.02218431                 |
| ENSG00000170919    | ENSG00000174498 | TPT1-AS1      | IGDCC3      | 0.018093202                 | 0.006831802                |
| ENSG00000214719    | ENSG00000152359 | AC005562.1    | POC5        | 0.029406285                 | 0.006958891                |
| ENSG00000214719    | ENSG00000119725 | AC005562.1    | ZNF410      | 0.032874564                 | 3.51x10 <sup>-14</sup>     |
| ENSG00000215068    | ENSG00000049768 | AC025171.1    | FOXP3       | 0.015717948                 | 0.016774044                |
| ENSG00000226200    | ENSG00000187240 | RP11-50E11.3  | DYNC2H1     | 0.035872336                 | 0.033357417                |
| ENSG00000227640    | ENSG00000170903 | SOX21-AS1     | MSANTD4     | 0.045805382                 | 0.000279638                |
| ENSG00000229196    | ENSG00000184731 | RP11-775D22.2 | FAM110C     | 0.020759728                 | 0.007473099                |
| ENSG00000230555    | ENSG00000095587 | RP11-517P14.2 | TLL2        | 0.049863295                 | 0.038766258                |
| ENSG00000232021    | ENSG00000160588 | LEF1-AS1      | MPZL3       | 0.03110137                  | 0.045807653                |
| ENSG00000236088    | ENSG00000076321 | COX10-AS1     | KLHL20      | 0.018874663                 | 0.023100157                |
| ENSG00000236088    | ENSG00000197020 | COX10-AS1     | ZNF100      | 0.024223331                 | 0.001334534                |
| ENSG00000236740    | ENSG00000155324 | RP11-411K7.1  | GRAMD3      | 0.038195353                 | 0.049550642                |
| ENSG00000240758    | ENSG00000108839 | RP11-155G14.6 | ALOX12      | 0.021588624                 | 0.014596184                |
| ENSG00000240859    | ENSG00000163599 | AC093627.10   | CTLA4       | 0.042377202                 | 0.016436949                |
| ENSG00000245060    | ENSG00000144199 | LINC00847     | FAHD2B      | 0.041842454                 | 0.00626976                 |
| ENSG00000254528    | ENSG00000182378 | RP11-728F11.4 | PLCXD1      | 0.038206103                 | 0.029416229                |
| ENSG00000255571    | ENSG00000148386 | LINC00925     | LCN9        | 0.039076404                 | 0.006690455                |
| ENSG00000255571    | ENSG00000171681 | LINC00925     | ATF7IP      | 0.024244489                 | 0.002694508                |
| ENSG00000256546    | ENSG00000134602 | AC156455.1    | MST4        | 0.032976983                 | 0.02361823                 |
| ENSG00000260464    | ENSG00000107954 | RP4-561L24.3  | NEURL       | 0.001112529                 | 0.019864865                |
| ENSG00000260793    | ENSG00000130827 | RP5-882C2.2   | PLXNA3      | 0.045948123                 | 0.047778843                |
| ENSG00000260793    | ENSG00000196865 | RP5-882C2.2   | NHLRC2      | 0.042539043                 | 0.001738834                |
| ENSG00000264772    | ENSG00000124882 | SNORA67       | EREG        | 0.037903342                 | 3.07x10 <sup>-6</sup>      |
| ENSG00000267080    | ENSG00000235194 | ASB16-AS1     | PPP1R3E     | 0.036684883                 | 0.042357738                |

lncRNA, long non-coding RNA.
